# Supplementary material for: Deep Medullary Vein and MRI Markers Were Related to Cerebral Hemorrhage Subtypes
Source: MDPI journal article supplement (doi:10.3390/brainsci13091315), 2023-09-13
Supplement: s1 [file s1]

| <b>Table S1</b> Magnetic resonance imaging protocols                                              |           |                                                                                                                                                     |
|---------------------------------------------------------------------------------------------------|-----------|-----------------------------------------------------------------------------------------------------------------------------------------------------|
| United Imaging                                                                                    | Sequences | Parameters                                                                                                                                          |
|                                                                                                   | T1WI      | TR = 4500 ms; TE = 102.5 ms; FOV = 240 mm × 200 mm; flip angle = 90°; slice thickness = 6 mm, matrix number = 352 × 316                             |
|                                                                                                   | T2WI      | TR = 6.4 ms; TE = 2.5 ms; inversion time(TI) = 830 ms; FOV = 250 mm × 220 mm; flip angle = 8°; slice thickness = 1 mm, matrix number = 240 × 240    |
|                                                                                                   | T2-Flair  | TR = 8500 ms; TE = 123 ms; inversion time(TI) = 2500 ms; FOV = 230 mm × 200 mm; flip angle = 90°; slice thickness = 6 mm, matrix number = 320 × 240 |
| Siemens                                                                                           | T1WI      | TR = 2000 ms; TE = 2.48 ms; FOV = 240 mm × 240 mm; flip angle = 90°; slice thickness = 1 mm, matrix number = 352 × 316                              |
|                                                                                                   | T2WI      | TR = 2880 ms; TE = 119 ms; FOV = 240 mm × 240 mm; flip angle = 90°; slice thickness = 5 mm, matrix number = 512 × 512                               |
|                                                                                                   | T2-Flair  | TR = 6877 ms; TE = 146 ms; FOV = 240 mm × 240 mm; flip angle = 90°; slice thickness = 5 mm, matrix number = 512 × 512                               |
| GE                                                                                                | T1WI      | TR = 2050 ms; TE = 8.7 ms; inversion time(TI) = 720 ms; FOV = 240 mm × 240 mm; flip angle = 90°; slice thickness = 5 mm, matrix number = 320 × 196  |
|                                                                                                   | T2WI      | TR = 4300 ms; TE = 106 ms; FOV = 240 mm × 240 mm; flip angle = 90°; slice thickness = 5 mm, matrix number = 240 × 240                               |
|                                                                                                   | T2-Flair  | TR = 7600 ms; TE = 148 ms; inversion time(TI) = 1900 ms; FOV = 240 mm × 240 mm; flip angle = 90°; slice thickness = 5 mm, matrix number = 288 × 192 |
| TR, repetition time; TE, echo time; FOV, field of view; Flair, fluidattenuated inversion recovery |           |                                                                                                                                                     |

| Table S2 The variability in all the MRI scores                                                                                                                                                                                                                                                                                                                                                                |       |                 |
|---------------------------------------------------------------------------------------------------------------------------------------------------------------------------------------------------------------------------------------------------------------------------------------------------------------------------------------------------------------------------------------------------------------|-------|-----------------|
|                                                                                                                                                                                                                                                                                                                                                                                                               | ICC   | <i>P</i> -value |
| FDMV                                                                                                                                                                                                                                                                                                                                                                                                          | 0.830 | <0.001          |
| PDMV                                                                                                                                                                                                                                                                                                                                                                                                          | 0.748 | <0.001          |
| ODMV                                                                                                                                                                                                                                                                                                                                                                                                          | 0.875 | <0.001          |
| TDMV                                                                                                                                                                                                                                                                                                                                                                                                          | 0.906 | <0.001          |
| PVS                                                                                                                                                                                                                                                                                                                                                                                                           | 0.777 | <0.001          |
| Lacuna                                                                                                                                                                                                                                                                                                                                                                                                        | 0.932 | <0.001          |
| CMB                                                                                                                                                                                                                                                                                                                                                                                                           | 0.987 | <0.001          |
| DWMH                                                                                                                                                                                                                                                                                                                                                                                                          | 0.946 | <0.001          |
| PWMH                                                                                                                                                                                                                                                                                                                                                                                                          | 0.936 | <0.001          |
| TWMH                                                                                                                                                                                                                                                                                                                                                                                                          | 0.958 | <0.001          |
| CSVD score                                                                                                                                                                                                                                                                                                                                                                                                    | 0.953 | <0.001          |
| FDMV, frontal deep medullary vein; PDMV, parietal deep medullary vein; ODMV, occipital deep medullary vein; TDMV, total deep medullary vein; PVS, perivascular space; CMB, cerebral microbleed; DWMH, deep white matter hyperintensity; PWMH, periventricular white matter hyperintensity; TWMH, total white matter hyperintensity; CSVD,cerebral small vessel disease; ICC,intraclass correlation efficient; |       |                 |
